# Supplementary material for: Rhus verniciflua as a green corrosion inhibitor for mild steel in 1 M H2SO4
Source: Royal Society of Chemistry journal article supplement (doi:10.1039/c6ra09637a), 2016-01-01
Supplement: c6ra09637a1.pdf [file c6ra09637a1.pdf]

***Rhus verniciflua* as a green corrosion inhibitor for mild steel in 1 M H<sub>2</sub>SO<sub>4</sub>**

Mayakrishnan Prabakaran,<sup>a</sup> Seung-Hyun Kim,<sup>a</sup> Venkatesan Hemapriya,<sup>b</sup> Mayakrishnan  
Gopiraman,<sup>a,c</sup> Ick Soo Kim,<sup>c</sup> and Ill-Min Chung<sup>a,\*</sup>

<sup>a</sup>*Department of Applied Bioscience, College of Life and Environmental Science, Konkuk University, Seoul 143 701, South Korea*

<sup>b</sup>*Department of Chemistry, PSGR Krishnammal College for Women, Coimbatore 641 004, Tamil Nadu, India*

<sup>c</sup>*Nano Fusion Technology Research Group, Division of Frontier Fibers, Institute for Fiber Engineering (IFES), Interdisciplinary Cluster for Cutting Edge Research (ICCER), Shinshu University, Tokida 3-15-1, Ueda, Nagano prefecture, 386-8567, Japan.*

\*Corresponding author.

Prof. Ill-Min Chung Tel: +82-02-450-3730 Fax: +82-02-446-7856 E-mail: imcim@konkuk.ac.kr

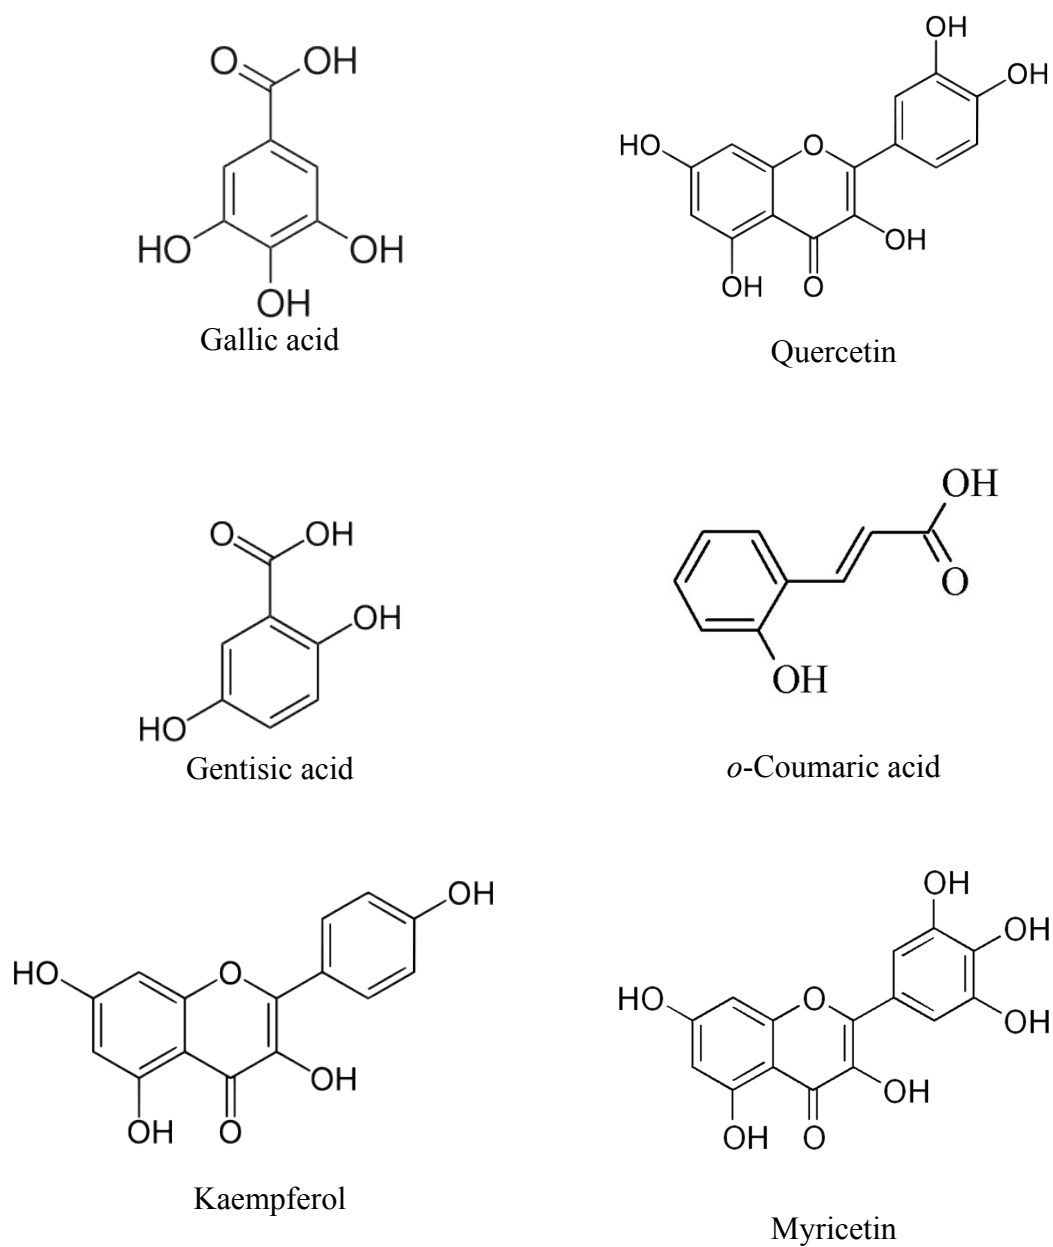

**Fig. S1.** Structures of major phenolic constituents identified in the *R. verniciflua* extract by UHPLC analysis.
